# Supplementary material for: Transcription of the Hydrogenase Gene during H2 Production in Scenedesmus Obliquus and Chlorella Vulgaris
Source: Research Square preprint supplement (doi:10.21203/rs.3.rs-342043/v1), 2021-03-24
Supplement: Supplementary file 1 [file c0fb28c58f68fdc3cbdbc0ff.docx]

| **Gene/specie** | **Primer name** | **Primer sequence (5’-3’)** | **Length** | **Amplicon size** | **References** |
| --- | --- | --- | --- | --- | --- |
| hydA/*Chlorella fusca* | hydA-FW | CCACTTCATAGACTGTGCGAAGTGC | 25 | 255pb | [32] |
| hydA-RV | GGCAATGCCAAGAAGCTCATCAAG | 24 |
| hydA/Chlamydomonas reinhardtii | CmI5A-FW | AATCTGCCGCTCAGCAAACA | 20 | 700pb | [33] |
| CmI5B-RV | CATCATCTGAGGCGACTTGC | 20 |
| hydA/*Chlamydomonas reinhardtii* | CmII5A-FW | TCAATGCCACGCTCAGTCAG | 20 | 700pb | [33] |
| CmII5B-RV | CTTCGGCGAAGAAGTTCTTG | 20 |
| hydA/*Chlamydomonas reinhardtii* | Hyd5-FW | GCCGCCCCSGCBGCBGARGC | 20 | 200pb | [34] |
| Hyd2-RV | CCAACCAGGGCAGCAGCTGGTGAA | 24 |
| HydA2/*Chlamydomonas reinhardtii* | HydA2-FW | CTGGACGTGACAAACAAGACCC | 22 | 150pb | [35] |
| HydA2-RV | TGACACTGTCTGTGCG | 16 |
